# Supplementary figures and images for: Passion Fruit Chlorotic Mottle Virus: Molecular Characterization of a New Divergent Geminivirus in Brazil
Source: MDPI journal article supplement (doi:10.3390/v10040169), 2018-04-02

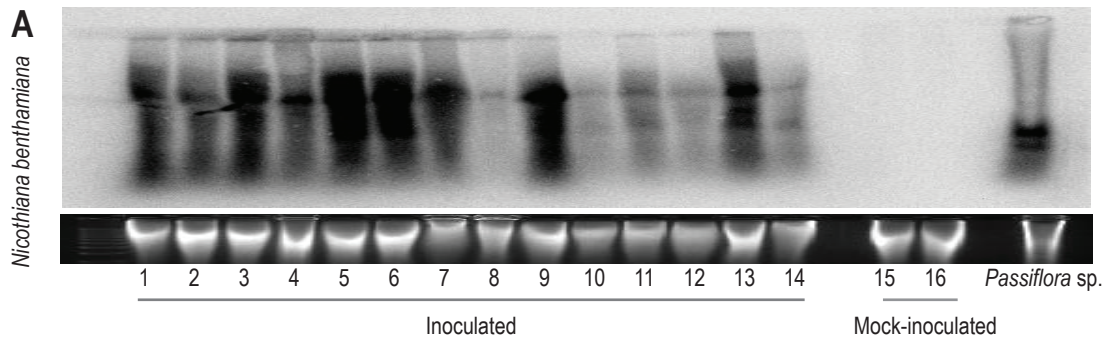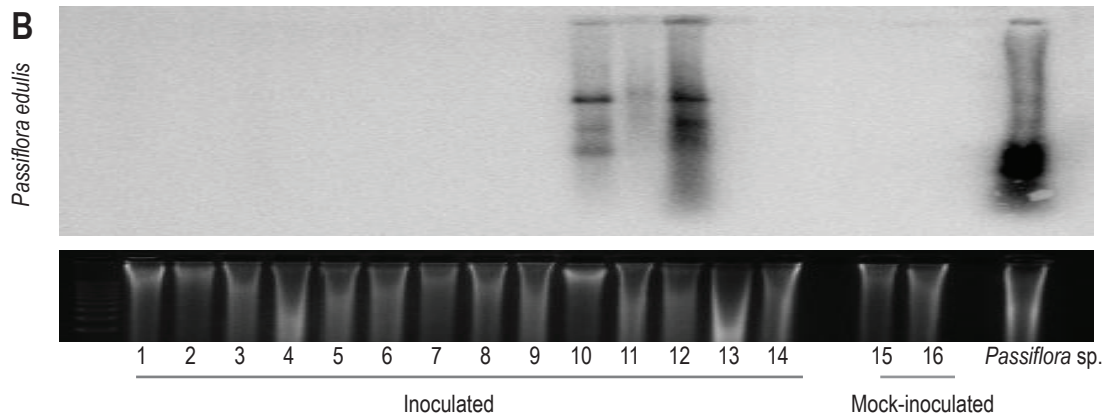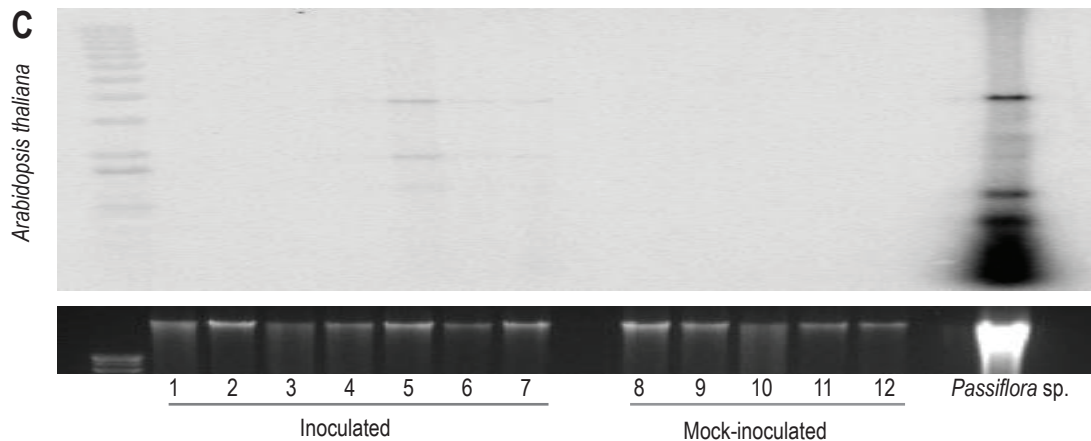

Supplement: s1 [file s1]
